# Supplementary material for: A Language Index of Grammatical Gender Dimensions to Study the Impact of Grammatical Gender on the Way We Perceive Women and Men
Source: Front Psychol. 2019 Jul 10;10:1604. doi: 10.3389/fpsyg.2019.01604 (PMC6644918; doi:10.3389/fpsyg.2019.01604)
Supplement: Supplementary file 1 [file Table_1.XLSX]

## Sheet: READ ME FIRST
How to read the Table
Section 1
The table contains 4 sections. In the first section, languages are devided into 5 groups depending on their representation of gender.
Group 1.1.	grammatical gender languages
Group 1.2.	languages with a combination of grammatical gender and natural gender
Group 1.3.	natural gender languages
Group 1.4.	genderless languages with a few traces of natual gender
Group 1.5.	genderless languages
All the cells concerning the other groups of languages are filled in with the indication not applicable.
Sections 2 to 4
These sections contain information that applies to all the languages.
How to interpret the labels
present	a given feature is obligatory or very common in the language
partially present	there are examples of this feature in the language, but they are exceptions, rather than rules
absent	the feature does not appear in the language

## Sheet: DataBase
		1.1 Grammatical gender languages														1.2 Languages with a combination of grammatical gender and natural gender				1.3 Natural gender languages				1.4 Genderless languages with a few traces of natual gender								1.5 Genderless languages		2 Derivation (all languages)
Language	General information	1.1 Agreement: determiners	1.1 Agreement: determiners, examples	1.1 Agreement: adjectives	1.1 Agreement: adjectives, examples	1.1 Agreement: verbs, predicative	1.1 Agreement: verbs, predicative, examples	1.1 Agreement: pronouns	1.1 Agreement: pronouns, examples	1.1 Agreement: pre-/postpositions	1.1 Agreement: pre-/postpositions, examples	1.1 Agreement: numerals/quantifiers	1.1 Agreement: numerals/quantifiers, examples	1.1 Gender distinction: plural	1.1 Gender distinction: plural, examples	1.2 Gender suffixes	1.2 Gender suffixes, examples	1.2 Social gender	1.2 Social gender, examples	1.3 Gender suffixes	1.3 Gender suffixes, examples	1.3 Social gender	1.3 Social gender, examples	1.4 Gender suffixes	1.4 Gender suffixes, examples	1.4 Adjectives	1.4 Adjectives, examples	1.4 Verb forms	1.4 Verb forms, examples	1.4 Other	1.4 Other, examples	1.5 Gender suffixes	1.5 Gender suffixes, examples	2 Derived female forms	2 Derived female forms, examples	2 Symmetric pairs	2 Symmetric pairs, examples	2 Derived personal names	2 Derived personal names, examples	2 Productive feminine suffixes	2 Productive feminine suffixes, examples	2 Competing feminine derivations	2 Competing feminine derivations, examples	2 Negative connotations of feminine suffixes	2 Negative connotations of feminine suffixes, examples	2 Feminine suffixe = diminutive	2 Feminine suffixe = diminutive, examples	2 Feminine suffixe for objects, etc.	2 Feminine suffixe for objects, etc., examples
Description	General information about gender in the language	Agreement exists on determiners (such as articles, demonstratives).		Agreement exists on adjectives and attributes.		Agreement exists on verbs and/or predicative adjectives.		Agreement exists on pronouns (personal, possessive, relative, demonstrative, interrogative etc.).		Agreement exists on prepositions and/or postpositions.		Agreement exists on numerals/quantifiers.		Gender distinction are retained in plural forms.		There are gender-suffixes used to coin gendered human nouns.		In general statements about persons, pronoun selection reflects stereotypical expectations (social gender).		There are gender-suffixes used to coin gendered human nouns.		In general statements about persons, pronoun selection reflects stereotypical expectations (social gender).		There are gender-suffixes used to coin gendered human nouns.		There are gender distinctions in adjectives.		There are gender distinctions in verb forms.		There are other differentiations related to gender.		There are gender-suffixes used to coin gendered human nouns.		Feminine-female forms are derived from masculine-male forms via suffixation.		There are structurally symmetric pairs of masculine-male and feminine-female nouns (different suffixes, but equal degree of morphological complexity).		Female personal names are derived from male names (via suffixation).		Feminine-female suffixes are productive (e.g. also with loanwords).		There are competing feminine-female derivations for the same masculine-male noun.		There are negative connotations of feminine-female suffixes.		Feminine-female suffix are also used for diminutives.		Feminine-female suffixes are also used to derive abstract or concrete nouns (objects, instruments etc.).
CHINESE	In Chinese, there is no grammatical gender for nouns.	not applicable		not applicable		not applicable		not applicable		not applicable		not applicable		not applicable		not applicable		not applicable		not applicable		not applicable		not applicable		not applicable		not applicable		not applicable		absent		absent		present	With regard to Chinese, 'gender-affixes' is more accurate than 'suffixes'. The logical order of coining / combining word compounds in Chinese: stem + prefix. Prefixes are '陰／陽' ["yin / yang"]; '男／女' ["male / female"]; '公／母' ["male / female"]. If the origins of words are considered, some parts of this form are quite arguable. Cases such as '鳳凰' ["phoenix"], '鴛鴦' ["mandarin duck"], '麒麟' ["kirin" (a…	absent		absent		absent		absent		absent		absent
CZECH	In Czech, there are three grammatical genders: masculine, feminine and neuter gender. Personal nouns are mostly of feminine or masculine gender.	present	'ten muž' masc. ["this man"] 'ta žena' fem. ["this woman"] 'to slovo' neut. ["this word"]	present	'český jazyk' masc. ["Czech language"] 'česká věta' fem. ["Czech sentence"] 'české slovo' neut. ["Czech word"] Some plural masculine forms distinguish formally between animate and inanimate nouns. 'čeští muži' masc. animate ["Czech men"] vs. 'české domy' masc. inanimate ["Czech houses"]	present	Different forms exist in the past tense, not in the present tense. 'student pracoval' ["the student.masc worked"] 'studentka pracovala' ["the student.fem worked"]	present	'on je mladý' masc. ["he is young"] 'ona je chytrá' fem. ["she is clever"] 'ono je lehké' neut. ["it is easy"]	absent		partially present	Gender distinction for some numerals and quantifiers, e.g. 'dva' ["two.masc"] 'dvě' ["two.fem/neut"] 'některý muž' masc. ["some man"] 'některá žena' fem. ["some woman"]	present	'Všichni muži jsou spojojení.' ["All men are pleased."] 'Všechny ženy jsou spojojené' ["All women are pleased."]	not applicable		not applicable		not applicable		not applicable		not applicable		not applicable		not applicable		not applicable		not applicable		present	'doktor, doktorka' ["doctor.masc, doctor.fem"]	present	'dospělý, dospělá' ["adult.masc, adult.fem"] Many of these forms are the (lexicalised) result of nominalised adjectives.	present	Derived personal names exist for first names: 'Petr, Petra' and patronyms: 'Novák, Nováková'	present	'manažer, manažerka' ["manager.masc, manager.fem"]	absent		absent		absent		partially present	e.g. '-ice' such as in 'strážnice' fem. ["police station, policewoman"]
DANISH	In Danish, there are two grammatical genders: common gender and neuter gender. Personal nouns are mostly of common gender.	not applicable		not applicable		not applicable		not applicable		not applicable		not applicable		not applicable		present	Very much like Norwegian: '-inde' is frequent in role names ('veninde' fem. ["friend"], 'svigerinde' fem. ["sister-in-law"], 'elskerinde' fem. ["lover"] etc.). Becoming old-fashioned in occupational titles ('lærerinde' fem. ["teacher"], 'danserinde' ["dancer"] etc.). Similar to the less frequent '-ske', ('sygeplejerske' fem. ["nurse"] [also male occupation], 'kætterske' fem. ["heretic"]) and the …	present	'The policeman ... han' ["he"] is common. 'The nurse ... hun' ["she"] is common, but so is 'han eller hende' ["he or she"]. The genitive form ('sin') is not gender-specific.	not applicable		not applicable		not applicable		not applicable		not applicable		not applicable		not applicable		partially present	'lærer' masc. ["teacher"], 'lærerinde' fem. ["teacher"],	absent		present	Derived female personal names exist for first names, but are no longer productive. '-ine' used to be productive ('Niels – Nielsine', 'Ole – Oline'). The derived female names are uncommon now. A few petrified '-a' derivations may exist: 'Peter – Petrea', 'Linus – Linnea'.	absent		absent		absent		partially present	Petrified in a few fem. names with '-ette' ('Henrik – Henriette'); does not associate to "small" anymore.	absent
DUTCH	In Dutch, the grammatical gender distribution depends on geographical area and other variables. There are either three grammatical genders (masculine, feminine and neuter gender) or two genders (common gender and neuter gender). Personal nouns are generally not of neuter gender.	not applicable		not applicable		not applicable		not applicable		not applicable		not applicable		not applicable		present	'astronaut' masc. ["astronaut"] 'astronaute' fem. ["astronaut“] 'handelaar' masc. ["tradesman"] 'handelaarster' fem. ["tradeswoman"] 'atleet' masc. ["athlete"] 'atlete' fem. ["athlete"] 'directeur' masc. ["director"] 'directrice' fem. ["director"]	present	'Een goed fotomodel neemt haar voeding serieus.' ["A good model takes her nutrition very seriously."] 'Iedereen in de kleedkamer was haar nagels aan het lakken.' ["Everyone in the dressing room was painting her nails."]	not applicable		not applicable		not applicable		not applicable		not applicable		not applicable		not applicable		present	Many names for profession can be feminized. 'astronaut' masc. ["astronaut"] 'astronaute' fem. ["astronaut"]	present	'verpleger' masc. ["male nurse"], 'verpleegster' fem. ["female nurse"] 'verkoper' masc. ["salesman", 'verkoopster' fem. ["saleswoman"]	present	Derived female personal names exist for first names, e.g. 'Hendrik/Hendrika, but not for patronyms or last names. NOTE: This is not really productive anymore and those names tend to be mostly fixed and often a bit old-fashioned.	present	'verpleegster' fem. ["nurse"] 'verkoopster' fem. ["sales woman"] 'wielrenster' fem. ["female speed cyclist"] 'atlete' fem. ["female athlete"] 'fotografe' fem. ["female photographer"] 'journaliste' fem. ["female journalist"]	absent		absent		absent		absent
ENGLISH	In English, there is no grammatical gender, but some nouns (especially personal nouns) have a semantic (masculine or feminine) gender.	not applicable		not applicable		not applicable		not applicable		not applicable		not applicable		not applicable		not applicable		not applicable		partially present	'actor' masc., 'actress' fem. 'hero' masc., 'heroine' fem. NOTE: tends to fall out of usage in some social groups and contexts	present	NOTE: usage variable depending on writer. Some authors make a point of countering expected gender. E.g. "A good engineer takes her work seriously.".	not applicable		not applicable		not applicable		not applicable		not applicable		partially present	'actor' masc., 'actress' fem. 'hero' masc., 'heroine' fem. NOTE: tends to fall out of usage in some social groups and contexts	partially present	'the chairman', 'the chairwoman' NOTE: such pairs tend to fall out of use and are replaced by neutral words such as 'chair'.	present	Derived female personal names exist for first names, e.g. 'Paul/Paula', but not for patronyms or last names.	partially present	'manager' masc. 'manageress' fem. 'actor' masc. 'actress' fem. NOTE: in many cases the feminine forms tend to fall out of use	absent		absent		partially present	'usher', 'usherette' 'kitchen', 'kitchenette' [diminutive]	absent
FRENCH	In French, there are two grammatical genders (masculine and feminine gender). Both are used for personal nouns and other nouns.	present	'le monsieur' masc. ["the man"] 'la dame' fem. ["the lady"]	present	'le bel homme' masc. ["the beautiful man"] 'la belle femme' fem. ["the beautiful woman"]	present	'Il est parti' masc. ["he is gone"] 'Elle est partie' fem. ["she is gone"] NOTE: only the past participle is inflected for gender.	present	'Il est grand.' masc. ["He is tall."] 'Elle est grande.' fem. ["She is tall."] 'cet homme' masc. ["this man"] 'cette femme' fem. ["this woman"] NOTE: interrogative and demonstrative pronouns do not mark gender.	absent		partially present	No agreement on numerals with the exception of: 'un' masc., 'une' fem. ["one"]. Agreement on the quantifier 'certain, certaine' ["some.masc, some.fem"] 'Certains murs sont blancs.' ["Some walls are white."] 'Certaines maisons sont blanches. ["Some houses are white."]	partially present	No distinction on plural with determiners: 'les murs' masc. plur. ["the walls"], 'les maisons' fem. plur. ["the houses"]. A distinction is preserved on plurals with personal pronouns. 'Ils mangent.' masc. plur. ["They.masc eat."] 'Elles mangent.' fem. plur. ["They.fem eat."]	not applicable		not applicable		not applicable		not applicable		not applicable		not applicable		not applicable		not applicable		not applicable		present	'étudiant' masc., étudiante' fem. ["student"] 'docteur' masc., 'doctoresse' fem. ["doctor"]	present	No distinction between some masculine and feminine forms. 'un artiste' masc., 'une artiste' fem. ["an artist"]	present	Derived female personal names exist for first names, e.g. 'Paul/Pauline', but not for patronyms or last names.	present	'un auteur' masc., 'une auteure' fem. ["an author"] 'un professeur' masc., 'une professeure' fem. ["a professor"] NOTE: this type of form is recent in language use especially in France	partially present	'un docteur' masc. 'une doctoresse' fem. ["a doctor"] 'un maitre' masc. 'une maitresse' fem. ["a master, a mistress"] NOTE: some of these forms are now replaced by a final '-e' in language use ('docteure' fem. ["doctor"] rather than 'doctoresse' fem. ["doctor"])	partially present	'-ette': 'gendarmette' fem. ["police officer"]	partially present	The feminine suffixe of some given names on '-ette' ('Pierrette, Paulette') is also used in diminutive forms ('fille, fillette' ["girl, young/small girl"]; 'maison, maisonnette' ["house, small house"])	partially present	'liseuse' fem. ["eBook reader"]
GERMAN	In German, there are three grammatical genders: masculine, feminine and neuter gender. Personal nouns are generally of masculine or feminine gender.	present	'der Mann' masc. ["the man"] 'die Frau' fem. ["the woman"] 'das Kind' neut. ["the child"] There is no agreement on plural forms.	present	'ein kleiner Mann' masc. ["a small man"] 'eine kleine Frau' fem. ["a small woman"] 'ein kleines Kind' neut. ["a small child"] There is no agreement on plural forms.	absent		present	'er, sie', 'es' masc., fem., neut. ["he, she, it"] There is no agreement on plural forms ('sie' ["they"]).	absent		partially present	Generally, cardinal numerals are not variable; exception: 'ein/eine' ["one"], which is also used as a determiner. Quantifiers are not variable when they are plurals (e.g. 'viele' ["many"]), but singular forms are variable (e.g. 'mancher/manche' ["some"]).	absent	Gender distinctions exist for personal nouns (e.g. 'Lehrerinnen und Lehrer' ["teachers.fem and teachers.masc."], but not for inflectional forms in general (such as in articles, pronouns, adjectives, etc.)	not applicable		not applicable		not applicable		not applicable		not applicable		not applicable		not applicable		not applicable		not applicable		present	'Freund, Freundin' ["friend.masc, friend.fem"]	present	'Beamt-er, Beamt-in' ["civil servant.masc, civil servant.fem."] 'Fremd-er, Fremd-e' ["stranger.masc, stranger.fem"]	present	Derived female personal names exist for first names, e.g. 'Michael/Michaela', but not for patronyms or last names.	present	'Manager, Managerin' ["manager.masc, manager.fem"]	partially present	'Masseur' ["masseur.masc"] 'Masseurin, Masseuse' fem. ["masseur.fem"]	partially present	Negative connotations may be related to a suffix like '-öse' (e.g. 'Massöse' fem. ["masseur"] or 'Frisöse' fem. ["hairdresser"]), which is fairly infrequent nowadays.	absent	The suffixe '-euse' is often interpreted as derogatory, compared to '-eurin' (e.g. 'Friseuse' fem., 'Friseurin' fem. ["hairdresser"].	partially present	'-euse' such as in 'Fritt-euse' fem. ["deep fryer"]
ITALIAN	In Italian, there are two grammatical genders: masculine and feminine gender. Both are used for personal nouns and other nouns.	present	'il signore' masc. ["the man"] 'la signora' fem. ["the woman"]	present	'l'uomo alto' masc. ["the tall man"] 'la donna alta' fem. ["the tall woman"]	present	'se n'è andato' masc. ["he is gone"] 'se n'è andata' fem. ["she is gone"] NOTE: only the past participle is inflected for gender.	present	'lui è alto.' masc. ["he is tall."] 'lei è alta.' fem. ["she is tall"] 'questo ragazzo' masc. ["this boy"] 'questa ragazza' fem. ["this girl"] NOTE: Interrogative forms (singular and plural) are not marked for gender. Possessives agree with the gender of the object.			partially present	'Certi muri.masc sono bianchi.' ["Some walls are white."] 'Certe case.fem sono bianche. ["Some houses are white."] Agreement with quantifiers but not with numerals, except 'one': 'un ragazzo' ["one boy"] 'una ragazza' ["one girl"]	present	'le ragazze' fem. ["the girls"] 'i ragazzi' masc. ["the boys"]	not applicable		not applicable		not applicable		not applicable		not applicable		not applicable		not applicable		not applicable		not applicable		present	'professore' masc. ["professor"] 'professoressa' fem. ["professor"] NOTE: There are also derivational suffixes not marked for gender in the sing form (e.g., '-ista', as in 'barista')	present	'postino' masc. ["postman"] 'postina' fem. ["postwoman"]	present	Derived female personal names exist for first names, e.g. 'Donato/Donatella', but not for patronyms or last names.	present	'attrice' fem. ["actress"] 'pittrice' fem. ["painter"]	partially present	'avvocata', fem., 'avvocatessa' fem. ["lawyer"]	partially present	'-essa', e.g. 'avvocatessa' fem. ["lawyer"]	absent		absent
NORWEGIAN	For Norwegian, two written varieties coexist: bokmål and nynorsk. The examples included in the table are based on bokmål. In contrast to nynorsk, which consistently uses three grammatical gender categories (feminine, masculine and neuter), bokmål accommodates either two or three gender categories, largely depending on a speaker’s regional variety, but also on other contextual factors such as moda…	not applicable		not applicable		not applicable		not applicable		not applicable		not applicable		not applicable		partially present	Suffixes to indicate a female referent do exist ('-inne', '-ske'), but are not productive for new words, and while the suffix -inne unambiguously denotes a female referent, its grammatical gender can be either feminine (e.g. 'ei grevinne'/'grevinna' [“a/the countess”]) or masculine (e.g. 'en grevinne'/'grevinnen' [“a/the countess”]), thus illustrating that grammatical gender is largely independen…	partially present	The subject-related possessive pronoun ('sin/sitt/sine' ["his, her"]) is neutral with respect to the subject’s gender, and general statements often remain gender neutral. However, stereotypical expectations may surface in the personal pronoun in alternative constructions. 'En lege stiller den diagnosen han (masc.) mener er riktig.' ["A good doctor makes the diagnosis he thinks is correct."].	not applicable		not applicable		not applicable		not applicable		not applicable		not applicable		not applicable		absent	Though this has been the case historically, it makes little sense to consider preserved examples in terms of derivation from male forms, as these derivations are no longer productive, and formerly masculine forms are now generic.	absent		present	Derived female personal names exist for first names, e.g. 'Paul/Paula', but not for patronyms or last names.	absent		absent		absent		absent		absent
POLISH	In Polish, there are three grammatical genders: masculine, feminine and neuter gender. Personal nouns are mostly of feminine or masculine gender.	present	'ten mężczyzna' masc. ["this man"] 'ta kobieta' fem. ["this woman") 'to okno' neut. ["this window"]	present	'wysoka dziewczyna' fem. ["tall girl"] 'wysoki chłopiec' masc. ["tall boy"] 'wysokie okno' neut. ["tall window"] Some plural masculine forms distinguish formally between animate and inanimate nouns. 'polscy mężczyźni' masc. animate ["Polish men"] vs. 'polskie domy' masc. inanimate ["Polish houses"]	present	Different forms exist in the past tense, not in the present tense. 'mężczyzna był' masc. ["the man was"] 'kobieta była' fem. ["the woman was"] 'miasto było' neut. ["the town worked"]	present	'on, jego' masc. ["he, his"] 'ona, jej' fem. ["she, her"] 'ono, jego' neut. ["it, its"]	absent		present	Gender distinction for some numerals and quantifiers, e.g. 'dwóch chłopców' masc. ["two boys"] 'dwie dziewczyny' fem. ["two girls"]	present	Gender distinctions exist for verbs in the past tense: 'śpiewały' ["sang.fem.plur."] 'śpiewali' ["sang.masc.plur."]	present	'astronauta' masc. ["astronaut"] 'astronautka' fem. [astronaut“] 'kelner' masc. ["waiter"] 'kelnerka' fem. ["waitress"] 'pianista' masc. ["pianist"] 'pianistka' fem. ["pianist"] 'dyrektor' masc. ["principle teacher"] 'dyrektorka' fem. ["principle teacher"]	not applicable		not applicable		not applicable		not applicable		not applicable		not applicable		not applicable		not applicable		present	'lekarz' masc. ["doctor.masc"] 'lekarka' fem. ["doctor.fem"]	absent		present	Derived female personal names exist for first names, e.g. 'Karol/Karolina', some last names (not popular anymore), previously used for wives and daughters: 'Janowicz' masc. vs. 'Janowiczowa' fem. ["wife of"] 'Janowiczanka'/'Janowiczówna' fem. ["daughter of"]	present	'uczeń' ["pupil.masc."] 'uczennica' ["pupil.fem."]	absent		partially present	Asymmetrical but not negative – for instance 'sekretarka' fem. means ["typist"] and 'sekretarz' masc. is a state function ["secretary"].	partially present	'muzyczka' fem. ["musician"] – meaning "not serious" music.	partially present	'pilot' masc. ["pilot" (person) vs. 'pilotka', fem. ["pilot's cap"] (object) 'drukarz' masc. ["printer"] (person) vs. 'drukarka' fem. ["printer"] (machine) 'cukiernik' masc. ["confectioner"] vs. 'cukierniczka' fem. ["sugar bowl"] 'kierowca' masc. ["rider"] vs. 'kierownica' fem. ["steering wheel""]
RUMANIAN	In Rumanian, there are three grammatical genders: masculine, feminine and neuter gender, but only two agreement markers (masculine and feminine). Personal nouns are mostly of feminine or masculine gender.	present	'bărbatul' masc. ["the man/male"] 'femeia' fem. ["the woman"] 'teatrul' neut. ["the theatre"]	present	'bărbatul înalt' masc. ["the tall man"] 'femeia înaltă' fem. ["the tall woman"] 'teatrul înalt' neut. ["the tall theatre"]	absent		present	Possessives agree with the possessor: 'fiul lui' ["his son"] 'fiica lui' ["his daughter"] 'fiul ei' ["her son"]	absent		partially present	Agreement on numerals only with one and two, and with all numbers ending in one or two (except 11 and 12). 'doi cai' masc. plur. ["two horses"] 'două iepe' fem. plur. ["two mares"]	present	'casele' fem. plur. ["the houses"] 'caii' masc. plur. ["the horses"]	not applicable		not applicable		not applicable		not applicable		not applicable		not applicable		not applicable		not applicable		not applicable		present	'student' masc. ["student"] 'studentă' fem. ["student"]	partially present	'ministru' masc. ["minister"] 'ministră' fem. ["minister]	present	Derived female personal names exist for first names, e.g. 'Ion/Ioana' but not for patronyms or last names.	present	'doctor' masc. ["doctor"] 'doctoriță' fem. ["doctor"]	absent		absent		absent	NOTE: the gender of the diminutive suffix depends on the gender of the noun.	absent
RUSSIAN	In Russian, there are three grammatical genders: masculine, feminine and neuter gender. Personal nouns are mostly of feminine or masculine gender.	present	'эта' fem. 'этот' masc. 'это' neut. ["this"]	present	'высокий человек' masc. ["tall man"] 'высокая женщина' fem. ["tall woman"] 'высокое дерево' neut. ["tall tree"]	present	'студент работал' ["student.masc worked.masc"] 'студентка работалa' ["student.fem worked.fem"] 'устройство работало' ["device.neuter worked.neut."]	present	'она' fem. ["she"] 'он' masc. ["he"] 'оно' neut. ["it"] 'её' fem. ["her"] 'его' masc. ["his"] 'eго' neut. ["its"] NOTE: This distinction is absent in the plural.	absent		partially present	'один' masc. ["one"] 'одна' fem. ["one"] 'oдно' neut. ["one"] два masc./neut. ["two"] 'две' fem. ["fem"] 'весь' masc. ["all"] 'вся' fem. ["all"] 'всё' neut. ["all"] 'оба' masc. / neut. ["both"] 'обе' fem. ["both"]	present	True for the quantifier "both" and role nouns. 'студентки' fem. plur. ["students"] 'студенты' masc. plur. ["students"]	not applicable		not applicable		not applicable		not applicable		not applicable		not applicable		not applicable		not applicable		not applicable		present	'студентка' ["female student"]	present	Applies to nouns referring to nationalities, e.g. 'американец' masc. ["American"] 'американка' fem. ["American" (this word also denotes a game and some tools)] and to nouns that are not used in reference to persons and have the same meaning, e.g. 'развилок' masc. ["intersection"] (rare) 'развилка' fem. ["intersection"]	present	First names: 'Александр' masc. ["Alexander"] 'Александра' fem. ["Alexandra"] Patronyms: 'Иванов' masc. ["Ivanovich"] 'Ивановна' fem. ["Ivanovna"] Last names: 'Морозов' masc. ["Morozov"] 'Морозова' fem. ["Morozova"]	present	'туристка' fem. ["tourist"] often with pejorative/negative connotations, in which case these nouns are not used in official documents 'докторша' fem. ["doctor"]	partially present	'директорша' 'директриса' ["female director"] 'врачиха' ["female doctor"] 'профессорша' ["female professor"] NOTE: these are colloquial uses only that carry a negative connotation	present	'психологиня' ["female psychologist"] 'профессорша' ["female professor"]	partially present	The diminutive suffix '-ичк' is often applied to feminine nouns ending with '-иц' 'пугов-ичк-а' fem. diminutive ["button"]	partially present	Some feminine suffixes otherwise used to denote persons can be used to denote objects (e.g., '-ка'). In some cases, there is an alternative feminine suffix denoting female persons: 'упаков-щик' masc. ["packager (person)"] 'упаковка' fem. ["packaging"] 'упаковщица' fem. ["packager (person"] In rare cases (may even no longer be used in contemporary Russian), there are no alternatives to express the…
SLOVAK	In Slovak, there are three grammatical genders: masculine, feminine and neuter gender. Personal nouns are mostly of feminine or masculine gender.	present	'ten muž' masc. ["this man"] 'tá žena' fem. ["this woman"] 'to mesto' neut. ["this town"] Most of the nouns use 'tie' ["these"] in plural except for some male animate nouns which use 'tí' ["these"].	present	'pekný muž' masc. ["beautiful man"] 'pekná žena' fem. ["beautiful woman"] 'pekné mesto' neut. ["beautiful town"] In the plural, most of the adjectives end in '-é', except for some male animate nouns that end in '-í'.	present	'študent pracoval' masc. ["the student.masc worked"] 'študentka pracovala' fem. ["the student.fem worked"]	present	'on je pekný' masc. ["he is clever"] 'ona je pekná' fem. ["she is clever"] 'ono je pekné' neut. ["it is clever"]	absent		partially present	Gender distinction for some numerals and quantifiers, e.g. 'dva' ["two.masc"] 'dve' ["two.fem/neut"] 'všetok' ["all.masc"] 'všetka' ["all.fem"] 'všetko' [all.neut"] In plural forms, there is no distinction between masc., fem. and neut. gender as such, but between masc. formes related to male living referents (e.g. 'všetci' ["all"]) and all kinds of other referents (masc., fem. or neut., e.g. 'vše…	partially present	In plural forms, there is no distinction between masc., fem. and neut. gender as such, but between masc. formes related to male living referents (e.g. 'všetci' ["all"]) and all kinds of other referents (masc., fem. or neut., e.g. 'všetky' ["all"].	not applicable		not applicable		not applicable		not applicable		not applicable		not applicable		not applicable		not applicable		not applicable		present	'študent' masc. ["student.masc "] 'študentka' fem. ["student.fem"]	partially present	'chyžní, chyžné' masc., fem. ["servant.masc, servant.fem"]	present	Derived personal names exist for first names: 'Peter, Petra' masc., fem. and patronyms: 'Kováč, Kováčová' masc., fem.	present	'manažér, manažérka' masc., fem. ["manager.masc, manager.fem"]	absent		absent		partially present	'-ka', '-ička' as in 'professor-ka' fem. ["(female) professor"] and in 'mam-ka' fem. ["(little) mother"]	partially present	'drukarka' fem. ["printer (object)"]
SPANISH	In Spanish, there are two grammatical genders: masculine and feminine gender. Both are used for personal nouns and other nouns.	present	'el hombre' masc. ["the man"] 'la mujer' fem. ["the woman"]	present	'el hombre listo' masc. ["the intelligent man"] 'la mujer lista' fem. ["the intelligen woman"	present	'está desaparecido' masc. ["he disappeared"] 'está desaparecida' fem. ["she disappeared"] NOTE: only the past participle is inflected for gender	present	'él come' masc. ["he eats"] 'ella come' fem. ["she eats "] 'este hombre' masc. ["this man"] 'esta mujer' fem. ["this woman"] 'el hombre el cual...' masc. ["the man who"] 'la mujer la cual...' fem. ["the woman who"]	absent		partially present	Agreement is marked on quantifiers : 'algún hombre' masc. ["some man"] 'alguna mujer' fem. ["some woman"] Agreement is only marked on ordinal numbers. 'el primer hombre' masc. ["The first man"] 'la primera mujer' fem. ["The first woman"]	present	'los hombres' masc.plur. ["the men"] 'las mujeres' fem.plur. ["the women"]	not applicable		not applicable		not applicable		not applicable		not applicable		not applicable		not applicable		not applicable		not applicable		present	'presidente' masc. 'presidenta' fem. ["president"] 'juez' masc. 'jueza' fem. ["judge"]	present	'amigo' masc. 'amiga' fem. ["friend"]	present	Derived female personal names exist for first names, e.g. 'Juan/Juana', but not for patronyms or last names.	absent	NOTE: the gender in such cases is marked by the article. 'el manager' ["the manager.masc] 'la manager' ["the manager.fem]	absent		partially present	'zorro' masc. ["crafty person"] 'zorra' fem. ["prostitute"]	absent		absent
SWISS GERMAN	In Swiss German, there are three grammatical genders: masculine, feminine and neuter gender. Personal nouns are generally of masculine or feminine gender.	present	'de maa' masc. ["the man"] 'd frau' fem. ["the woman"] 's chind' neut. ["the child"]	present	'e schöne maa' masc. ["a beautiful man"] 'e schöni frau' fem. ["a beautiful woman"] 'es schöns chind' neut. ["a beautiful child"] Determiners as well as adjectives may vary according to specific dialects and according to morphosyntactic rules (e.g. generally, there is no inflection after the definite article: 'de schön maa' ["the beautiful man"], 'di schön frau' ["the beautiful woman"])	absent		present	'är, si, äs' masc., fem., neut. ["he, she, it"]	absent		partially present	Generally, cardinal numerals are not variable; exception (in some dialects): 'zwo.masc, zwee.fem, zwöi.neut' ["two"]. Quantifiers are not variable when they are plurals (e. g. 'vil(i)' ["many"]), but singular forms are variable (e. g. 'mänge.masc, mäng.fem., mängs.neuti' ["some"]).	absent		not applicable		not applicable		not applicable		not applicable		not applicable		not applicable		not applicable		not applicable		not applicable		present	'fründ, fründin' ["friend.masc, friend.fem"]	present	'e frömde, e frömdi' ["stranger.masc, stranger.fem"]	present	Derived female personal names exist for first names, e.g. 'Urs/Ursula', but not for patronyms or last names.	present	'manager, manageri(n)' ["manager.masc, manager.fem"]	partially present	'coiffeur' masc ["haidresser.masc"], 'coiffeuse, coiffeurin' fem ["hairdresser.fem"]	partially present	Negative connotations may be related to a suffix like '-öös' (e.g. 'massöös' fem. ["masseur"].	absent		partially present	'-öös' such as in 'frit-öös' fem. ["deep fryer"]
[truncated: 30 more columns]
